# Supplementary material for: Polymorphic Cytochrome P450 Enzymes (CYPs) and Their Role in Personalized Therapy
Source: PLoS One. 2013 Dec 10;8(12):e82562. doi: 10.1371/journal.pone.0082562 (PMC3858335; doi:10.1371/journal.pone.0082562)
Supplement: Table S1 — Extended table of CYP SNP frequencies in Caucasians and other ethnics. The table includes the content of Table 1 and further information (other ethnics and nucleotide changes) that have been extracted by text mining. (XLSX) [file pone.0082562.s001.xlsx]

## Sheet: Tabelle1
Cytochrome	Allel	Gene	Amino acid effect	Asian (%)	Caucasian (%)	African (%)	other/unknown (%)	Enzyme effect	References (PMID)
CYP1A1	*2A and *2B	3798T>C (MspI)	I462V	54.3	19.0	28.3	28.3 Hispanics	increased enzyme activity	19514967
CYP1A2	*1F	-163C>A			33.3			higher inducibility	12534642 / 22299824
	*1D	2464T→delT			4.82			increase	12534642 / 20797314
CYP2A6	*12	exons 1-2 of CYP2A7 origin; exons 3-9 of CYP2A6 origin; 1620T>C; 1630G>C; 3396G>A; 4489C>T; 5163G>A; 5545G>C; 5717C>G; 6692C>G	10 aa substitutions	0.8	2.9	0.4		decreased expression	16041240
	*1B	1680A>G; -1579T>C; -1464A>T; -1301A>C; -1289G>A; 1620T>C; gene conversion in 3’ flanking region		26.7	32.6			increase	22850738
	*2	51G>A; 1799T>A	L160H	0.0	1-3			Inactive enzyme	11259354
	*4	CYP2A6 deleted	CYP2A6 deleted	15.0	1.0			no enzyme	11259354
	*9	1680A>G: -1301A>C; -1289G>A; -1013A>G; -48T>G; 1620T>C; 1836G>T; 6354T>C; 6692C>G		15.6	7.1	7.1	20.3 (Japanese)	decreased expression	15475735
CYP3A4	*17	15615T>C	F189S		2.0			decrease	11714865
	*1B	-392A>G			17.0			increase and associated with the onset of puberty	12692107
	*2	15713T>C	S222P	0.0	2.7	0.0		decrease	10668853
CYP3A5	*3C	6986A>G	Splicing defec		81.3			express insignificant levels	17162466
	*3k / *10	6986A>G; 29753T>C; 31611C>T	Splicing defect; F446S		2.0			very low activity	12893984
CYP3A7	*2	26041C>G	T409R	28.0	8.0	62.0	17.0 (Saudi Arabian)	increase	15903124
CYP2C9	*2	430C>T	R144C		19.0% *1/*2 1.6% *2/*2 1.8 % *2/*3			poor metabolizer	15284536
	*3	1075A>C	I359L		9.0		2.0	poor metabolizer / altered substrate specificity	11678789
CYP2C19	*2	19154G>A	splicing defect (I331V)		16.0		12.0	poor metabolizer	10460072
	*17	-3402C>T; -806C>T; 99C>T; 80161A>G	I331V		18.0			increased transcriptional activity	21247447
CYP2D6	*3	1749A>G; 2549delA	N166D; 259Frameshift		2.04			poor metabolizer	9012401
	*4	997C>G; 1846G>A	P34S; L91M; H94R; splicing defect; S486T		20.7			poor metabolizer	9012401
	*4D	100C>T; 1039C>T; 1661G>C; 1846G>A; 4180G>C	P34S; splicing defect; S486T		3.4			poor metabolizer	11266079
	*4L	100C>T; 997C>G; 1661G>C; 1846G>A; 4180G>C	P34S; splicing defect; S486T		4.5			poor metabolizer	11266079
	*5	CYP2D6 deleted	CYP2D6 deleted		4.1			no enzyme	9511177
	*6	1707delT; 1976G>A; 4180G>C; 3288G>A	118Frameshift		1.3			nonfunctional	9511177
	*7	2935A>C	H324P		1.0			poor metabolizer	9089660
	*9	2615_2617delAAG	K281del		2.0			poor metabolizer	9511177
	*10	1426C>T; -1237_-1236insAA; -1235A>G; -1000G>A; 100C>T; 1039C>T; 1661G>C; 4180G>c	P34S; S486T		8.0	7.5		decrease / unstable enzyme	9511177 / 11505219
	*41	1584C; -1235A>G; -740C>T; -678G>A; CYP2D7 gene conversion in intron 1; 1661G>C; 2850C>T; 2988G>A; 4180G>c	R296C; splicing defect; S486T		8.0			low expression	15289790
CYP2B6	*5	1459C>T	R487C		14.0			reduced enzyme expression	11470993
	*2	64C>T	R22C		5.3			increase	21746968 / 12242601
	*4	18053A>G	K262R		5.0			1.66-fold higher activity	14515060
	*6	516G>T; 785A>G	Q172H; K262R		25.0			decreased expression	14515060
	*7	516G>T; 785A>G; 1459C>T	Q172H; K262R; R487C		3.0			increased values for Vmax	12242601 / 14551287
	*22	-1848C>A; -801G>T; -750T>C, -82T>C	Incr. transcr.		3.0			increased expression	15722458
